# Supplementary material
Source: MDPI journal article supplement (https://www.mdpi.com/2218-1997/9/6/258)
Supplement: s1 [file s1]

Archive with 3 entries (3 files):
- universe-2338691-supplementary.pdf
- VidS1.mp4
- VidS2.mp4
